# Supplementary material for: Novel mutational landscapes and expression signatures of lung squamous cell carcinoma
Source: PubMed Central journal article supplement (PMC5800913; doi:10.18632/oncotarget.23716), 2017-12-27
Supplement: oncotarget-09-7424-s001.pdf [file oncotarget-09-7424-s001.pdf]

## Novel mutational landscapes and expression signatures of lung squamous cell carcinoma

### SUPPLEMENTARY MATERIALS

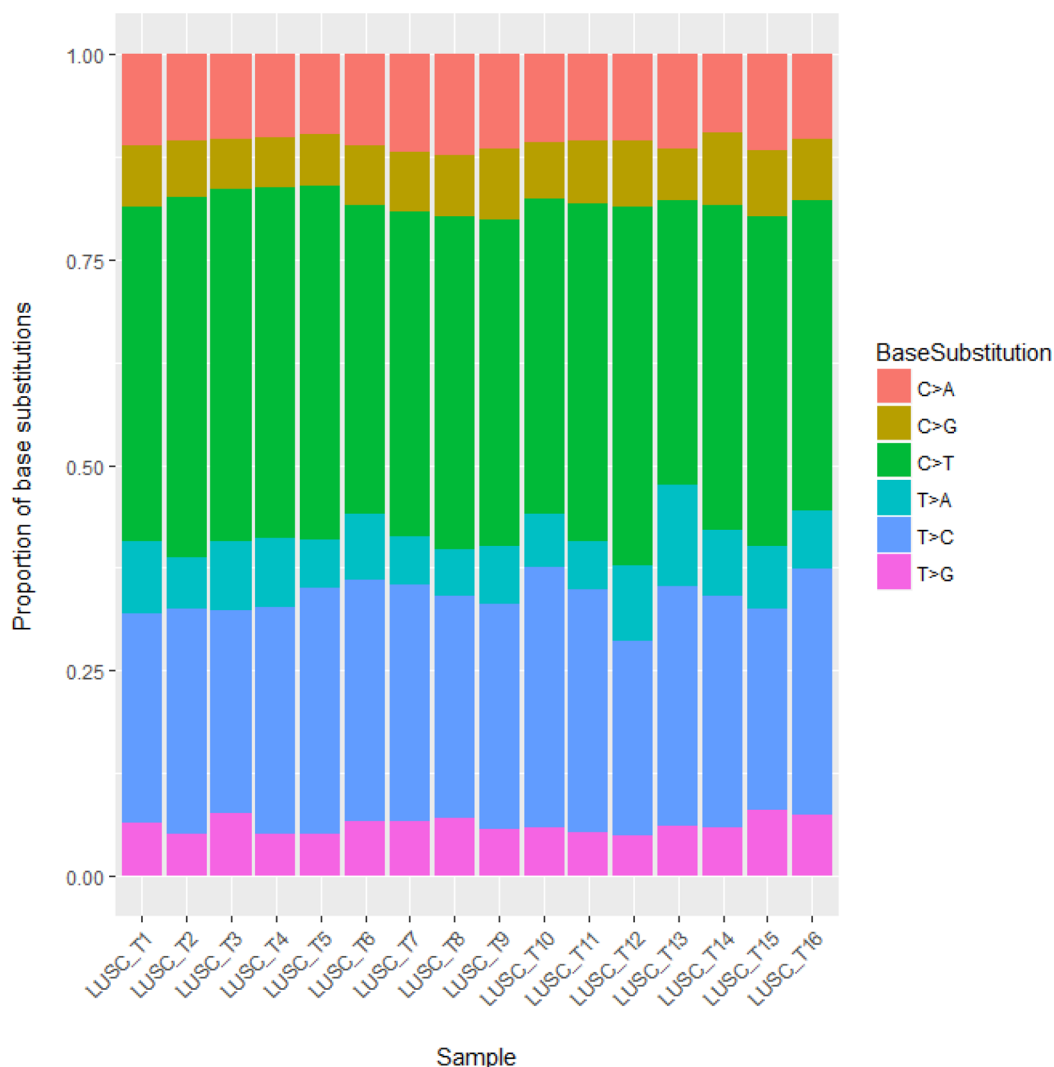

**Supplementary Figure 1: Spectrum of base substitutions based in the 16 mouse LUSCs.** The most common substitutions were C>T transversions. In addition, it can be seen that there is no difference in the proportion of each mutation category between the mouse LUSC tumors with wild-type *Trp53* (LUSC\_T1 to LUSC\_T8) and those with the *Trp53* p.A135V germline mutation (LUSC\_T9 to LUSC\_T16), suggesting that the somatic coding mutations were mainly driven by the exposure to NTCU rather than the *Trp53* p.A135V germline mutation.

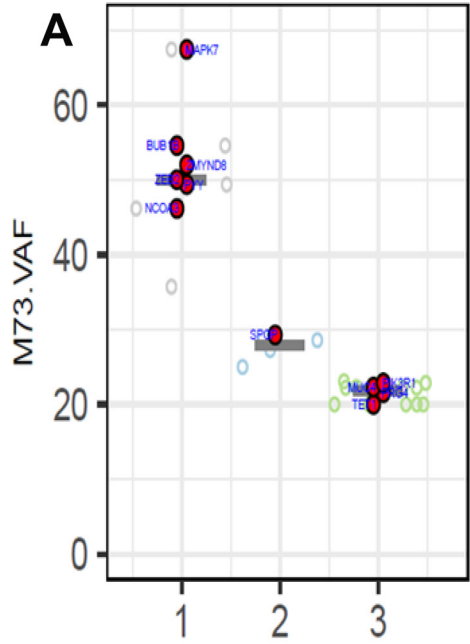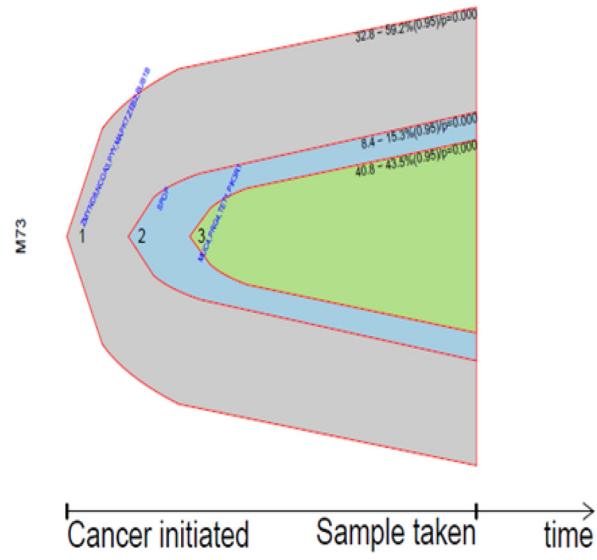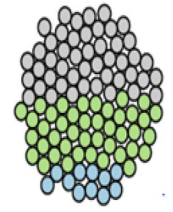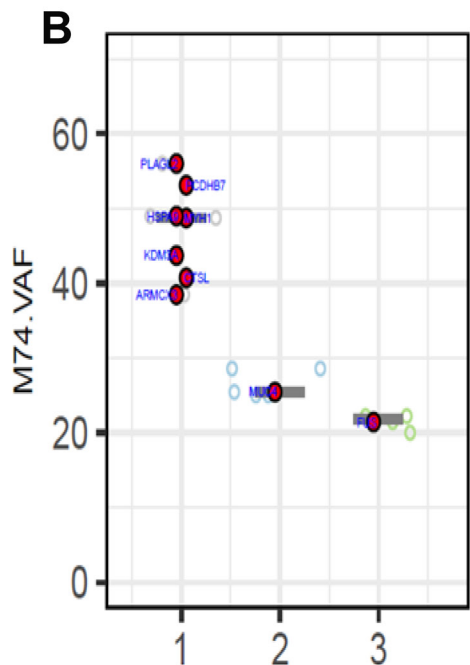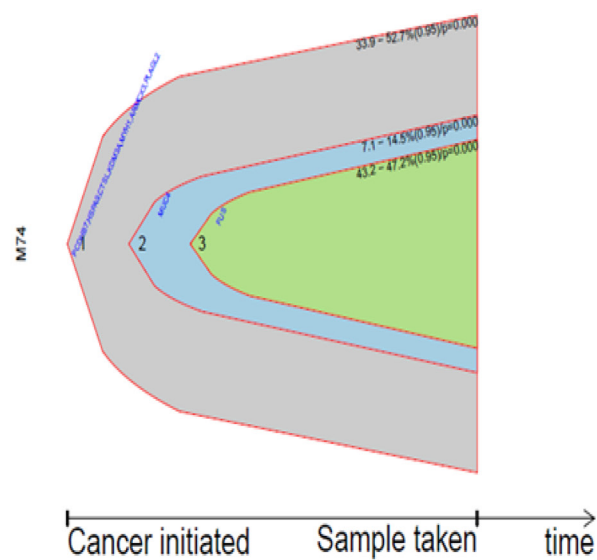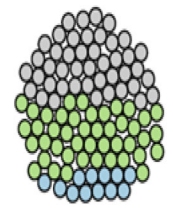

**C**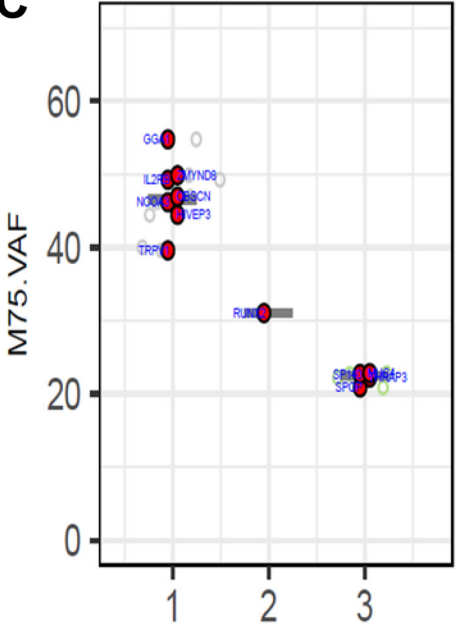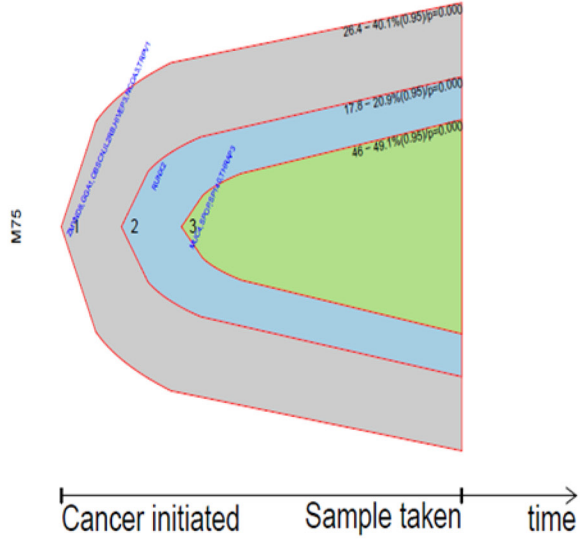**D**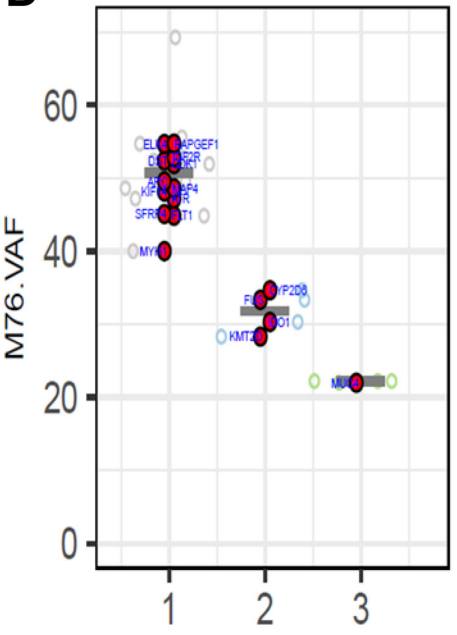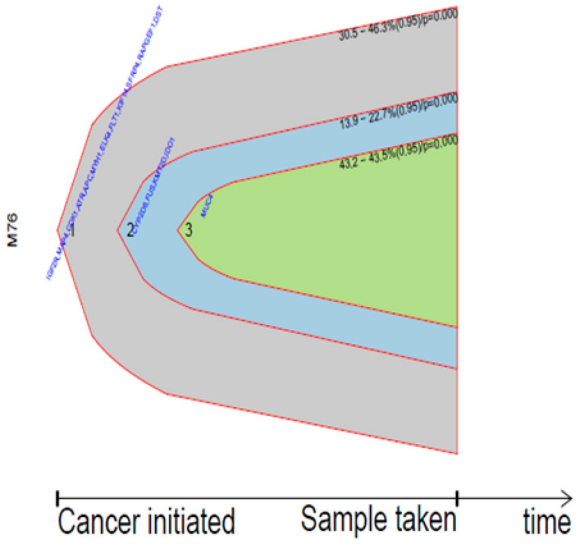

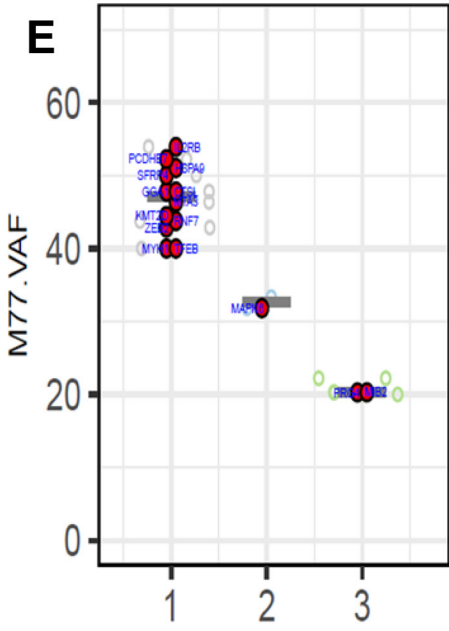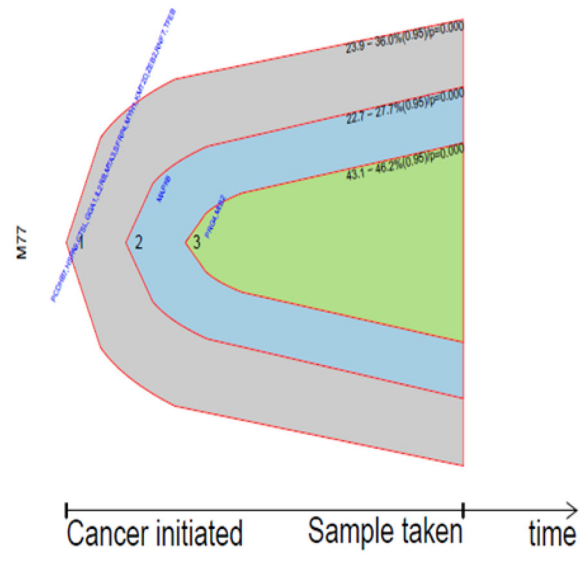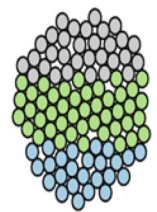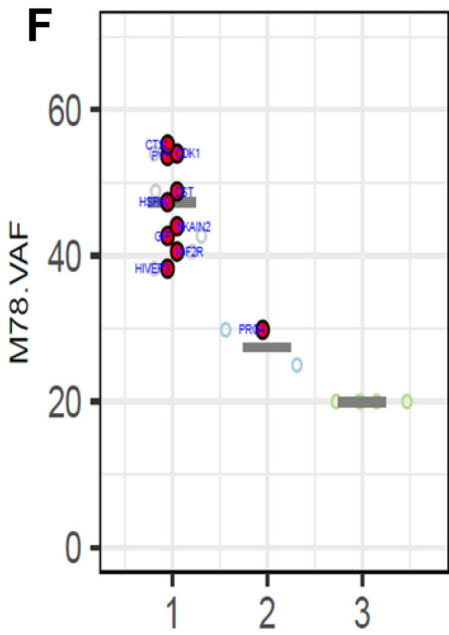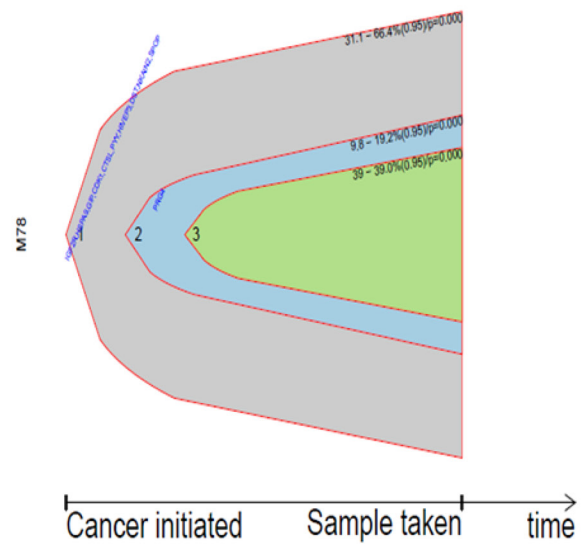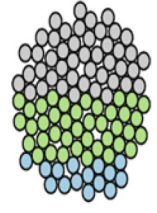

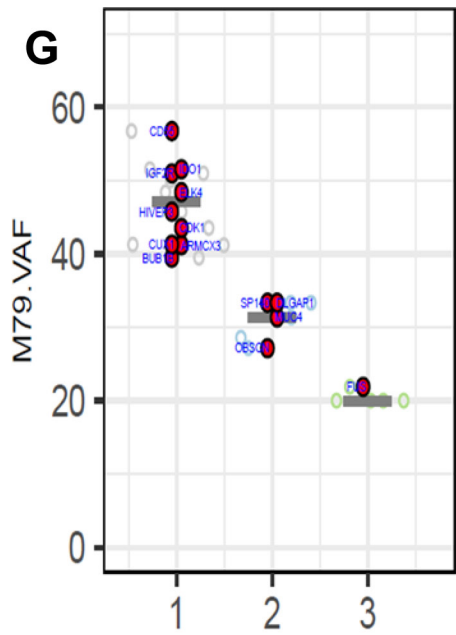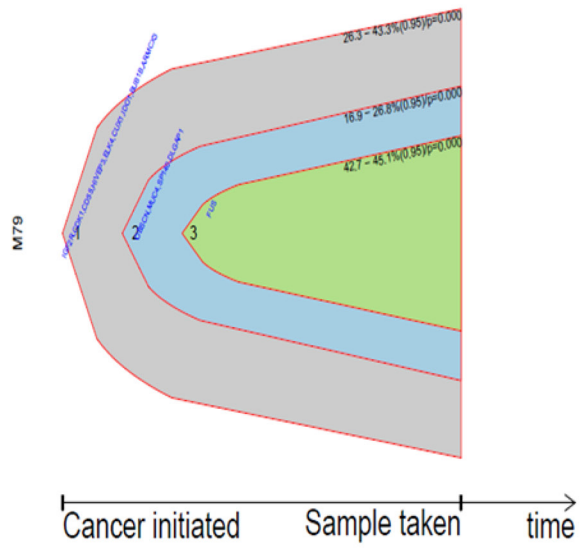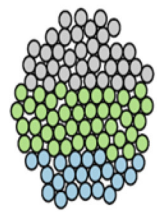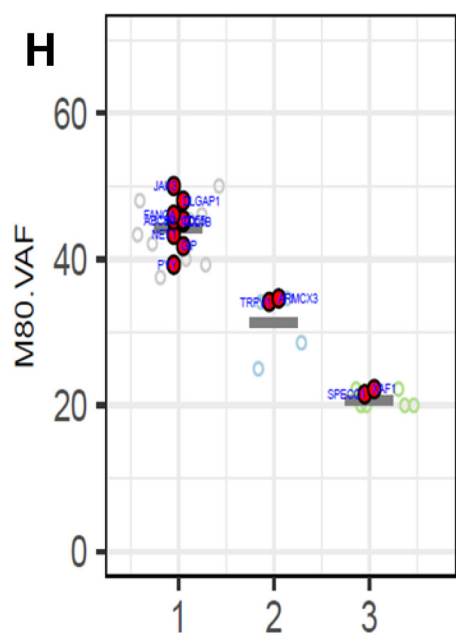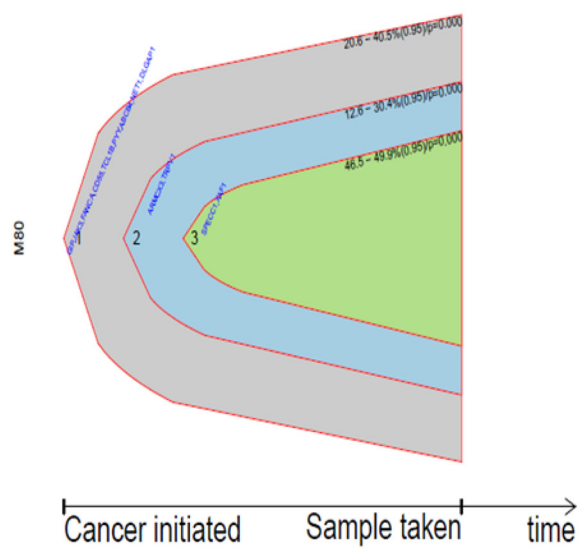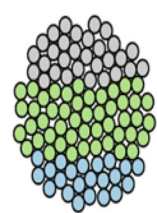

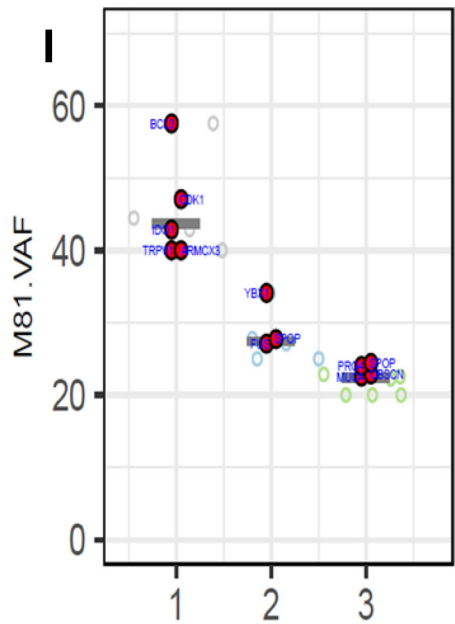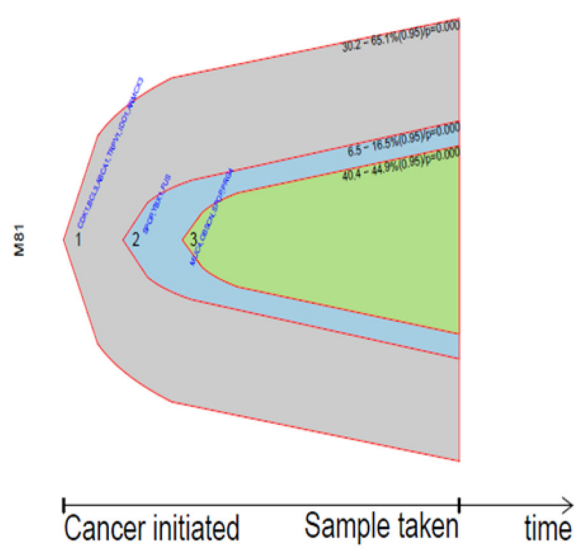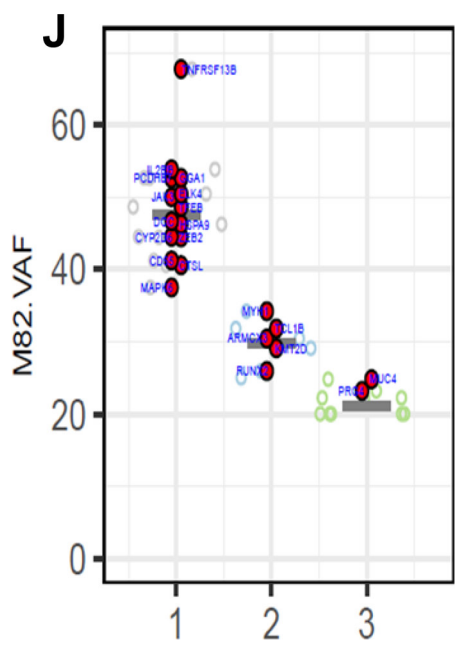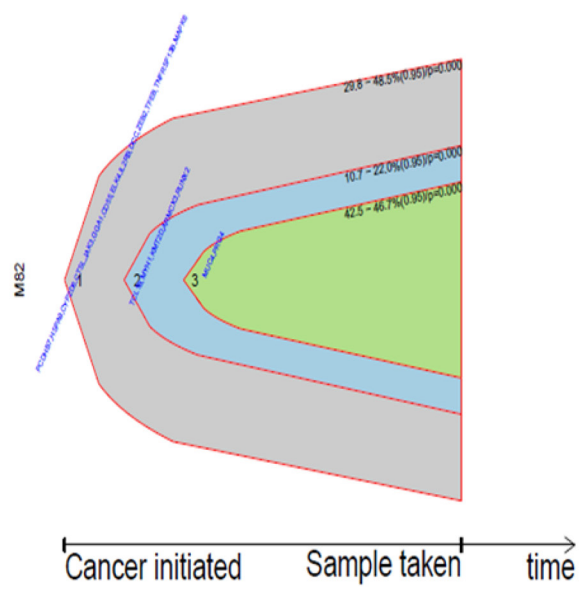

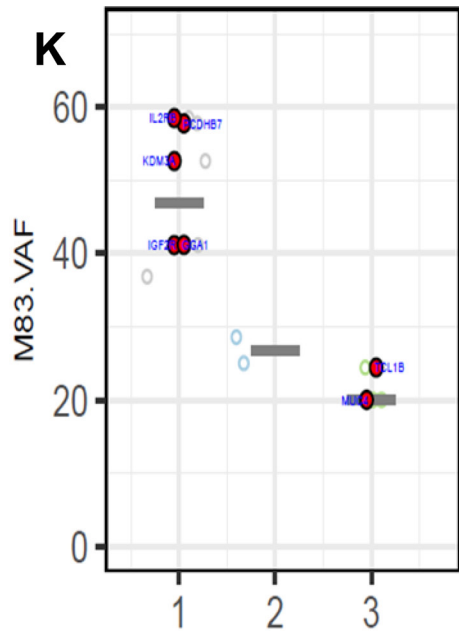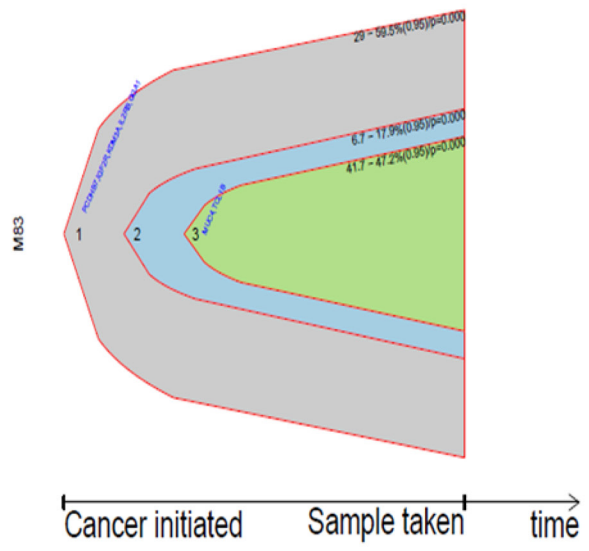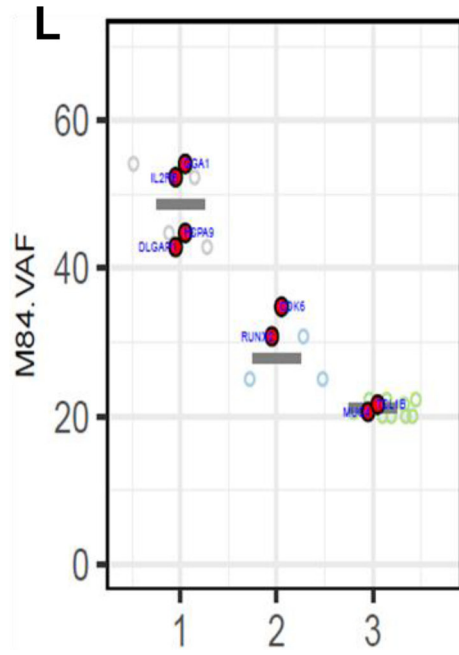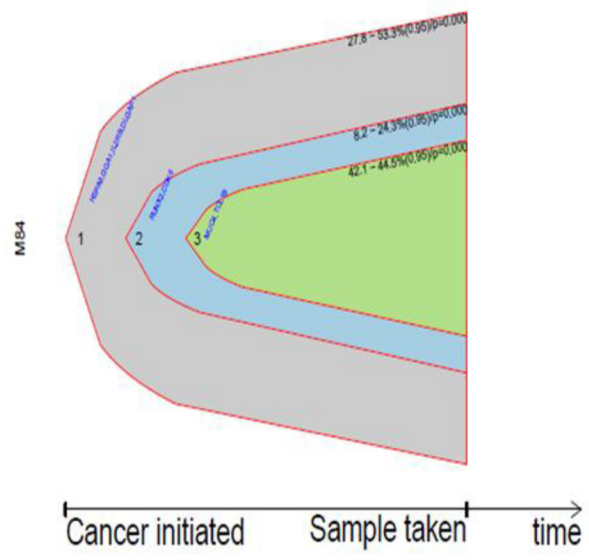

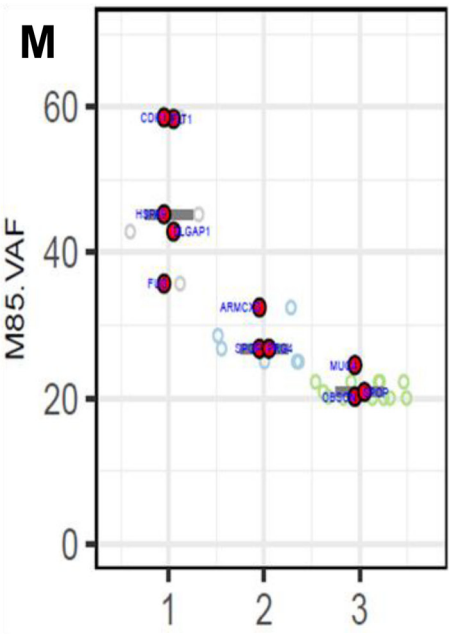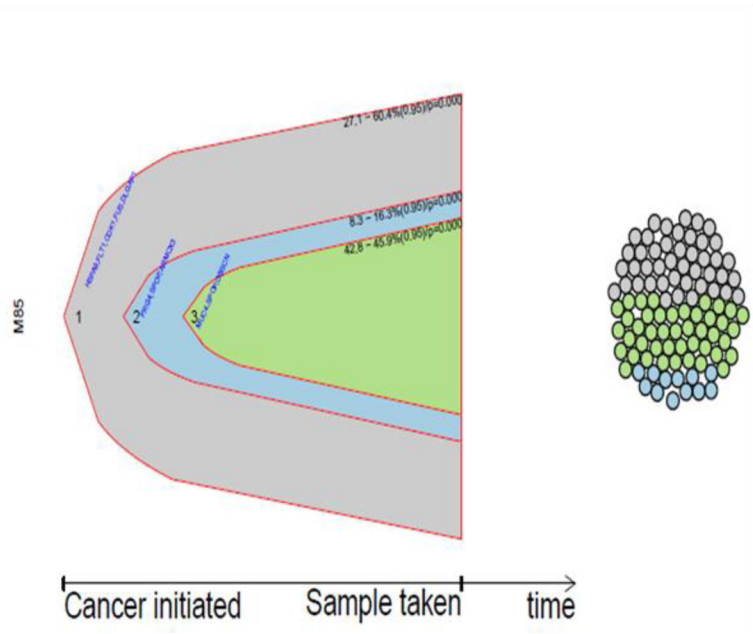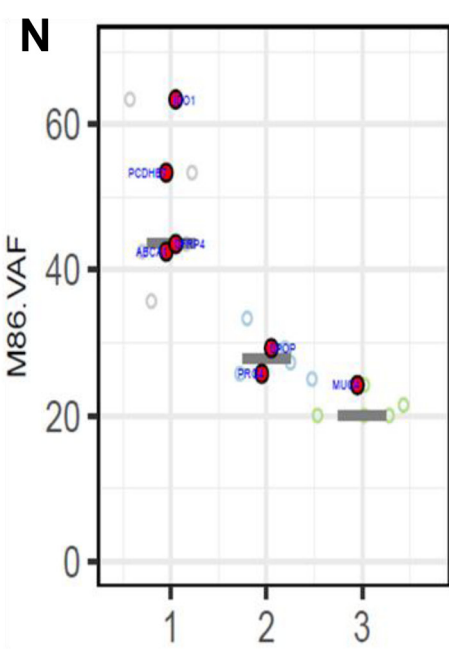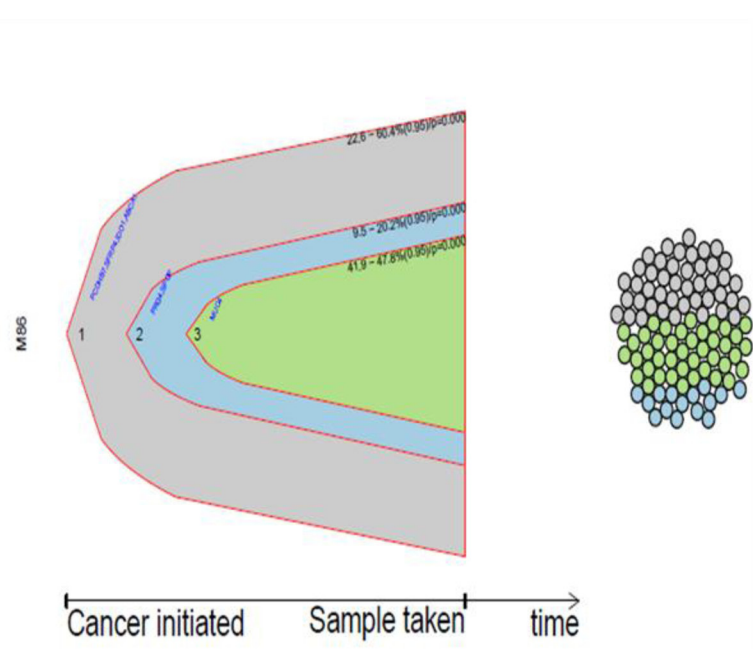



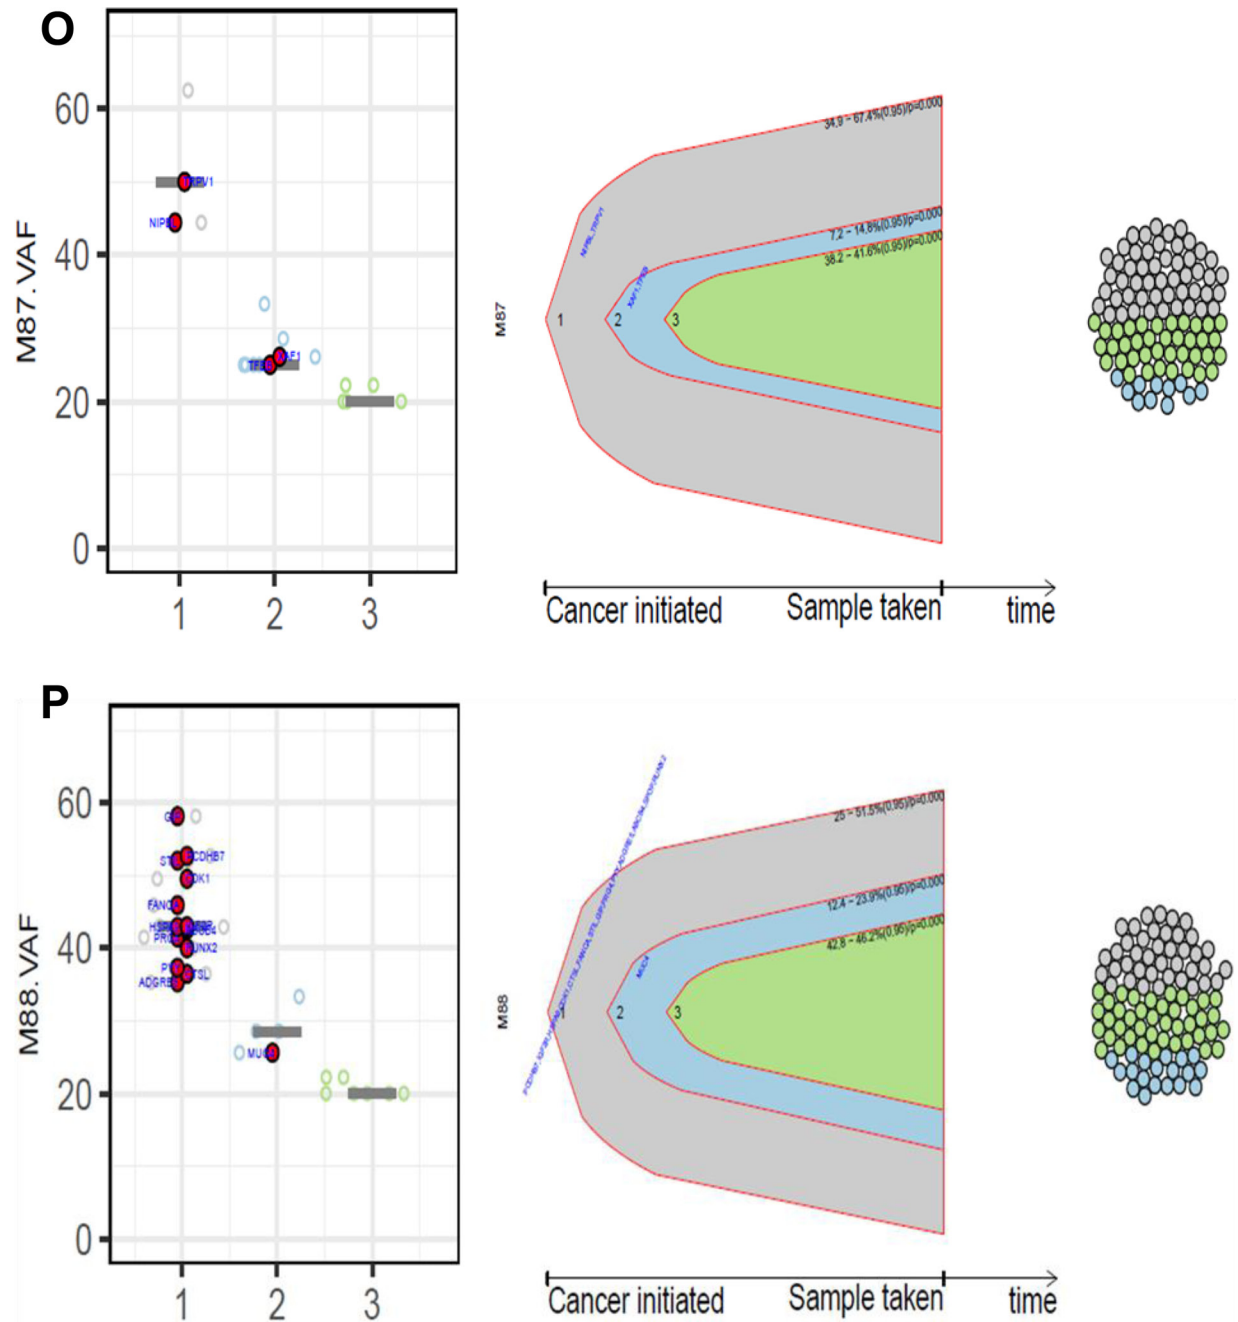

**Supplementary Figure 2: Clonal analysis of 16 mouse lung squamous carcinoma tumors – LUSC\_T1 to LUSC\_T16.** (A) Mouse LUSC\_T1 tumor: the cancer genes harboring the clonal mutations include *MAPK7*, *NCOA7*, *BUB1B*, *ZEB2*, *ZMYND8*, *PYY*. (B) Mouse LUSC\_T2 tumor: the cancer genes harboring the clonal mutations include *PCDHB7*, *HSPA9*, *CTSL*, *KDM3A*, *MYHI*, *ARMCX3*, *PLAGL2*. (C) Mouse LUSC\_T3 tumor: the cancer genes harboring the clonal mutations include *ZMYND8*, *GGAI*, *OBSCN*, *IL2RB*, *HIVEP3*, *NCOA7*, *TRPV1*. (D) Mouse LUSC\_T4 tumor: the cancer genes harboring the clonal mutations include *IGF2R*, *MAP4*, *CDK1*, *ATR*, *APC*, *MYHI*, *ELK4*, *FLT1*, *KIF14*, *SFRP4*, *RAPGEF1*, *DST*. (E) Mouse LUSC\_T5 tumor: the cancer genes harboring the clonal mutations include *PCDHB7*, *HSPA9*, *CTSL*, *GGAI*, *IL2RB*, *MTA3*, *SFRP4*, *MYHI*, *KMT2D*, *ZEB2*, *RNF7*, *TFEB*. (F) Mouse LUSC\_T6 tumor: the cancer genes harboring the clonal mutations include *IGF2R*, *HSPA9*, *GIP*, *CDK1*, *CTSL*, *PYY*, *HIVEP3*, *DST*, *NKAIN2*, *SPOP*. (G) Mouse LUSC\_T7 tumor: the cancer genes harboring the clonal mutations include *IGF2R*, *CDK1*, *CD55*, *HIVEP3*, *ELK4*, *CUX1*, *IDO1*, *BUB1B*, *ARMCX3*. (H) Mouse LUSC\_T8 tumor: the cancer genes harboring the clonal mutations include *GIP*, *JAK3*, *FANCA*, *CD55*, *TCL1B*, *PYY*, *ABC4*, *NET1*, *DLGAP1*. (I) Mouse LUSC\_T9 tumor: the cancer genes harboring the clonal mutations include *CDK1*, *BCL3*, *ABCA1*, *TRPV1*, *IDO1*, *ARMCX3*. (J) Mouse LUSC\_T10 tumor: the cancer genes harboring the clonal mutations include *HSPA9*, *CYP2D6*, *CTSL*, *JAK3*, *GGAI*, *CD55*, *ELK4*, *IL2RB*, *DCC*, *ZEB2*, *TFEB*, *TNFRSF13B*, *MAPK6*. (K) Mouse LUSC\_T11 tumor: the cancer genes harboring the clonal mutations include *PCDHB7*, *IGF2R*, *KDM3A*, *IL2RB*, *GGAI*. (L) Mouse LUSC\_T12 tumor: the cancer genes harboring the clonal mutations include *HSPA9*, *GGAI*, *IL2RB*, *DLGAP1*. (M) Mouse LUSC\_T13 tumor: the cancer genes harboring the clonal mutations include *HSPA9*, *FLT1*, *CDK1*, *FUS*, *DLGAP1*. (N) Mouse LUSC\_T14 tumor: the cancer genes harboring the clonal mutations include *PCDHB7*, *SFRP4*, *IDO1*, *ABCA1*. (O) Mouse LUSC\_T15 tumor: the cancer genes harboring the clonal mutations include *NIPBL* and *TRPV1*. (P) Mouse LUSC\_T16 tumor: the cancer genes harboring the clonal mutations include *IGF2R*, *HSPA9*, *CDK1*, *CTSL*, *FANCA*, *STIL*, *GIP*, *PRG4*, *PYY*, *ADGRE5*, *ABC4*, *SPOP*, *RUNX2*.

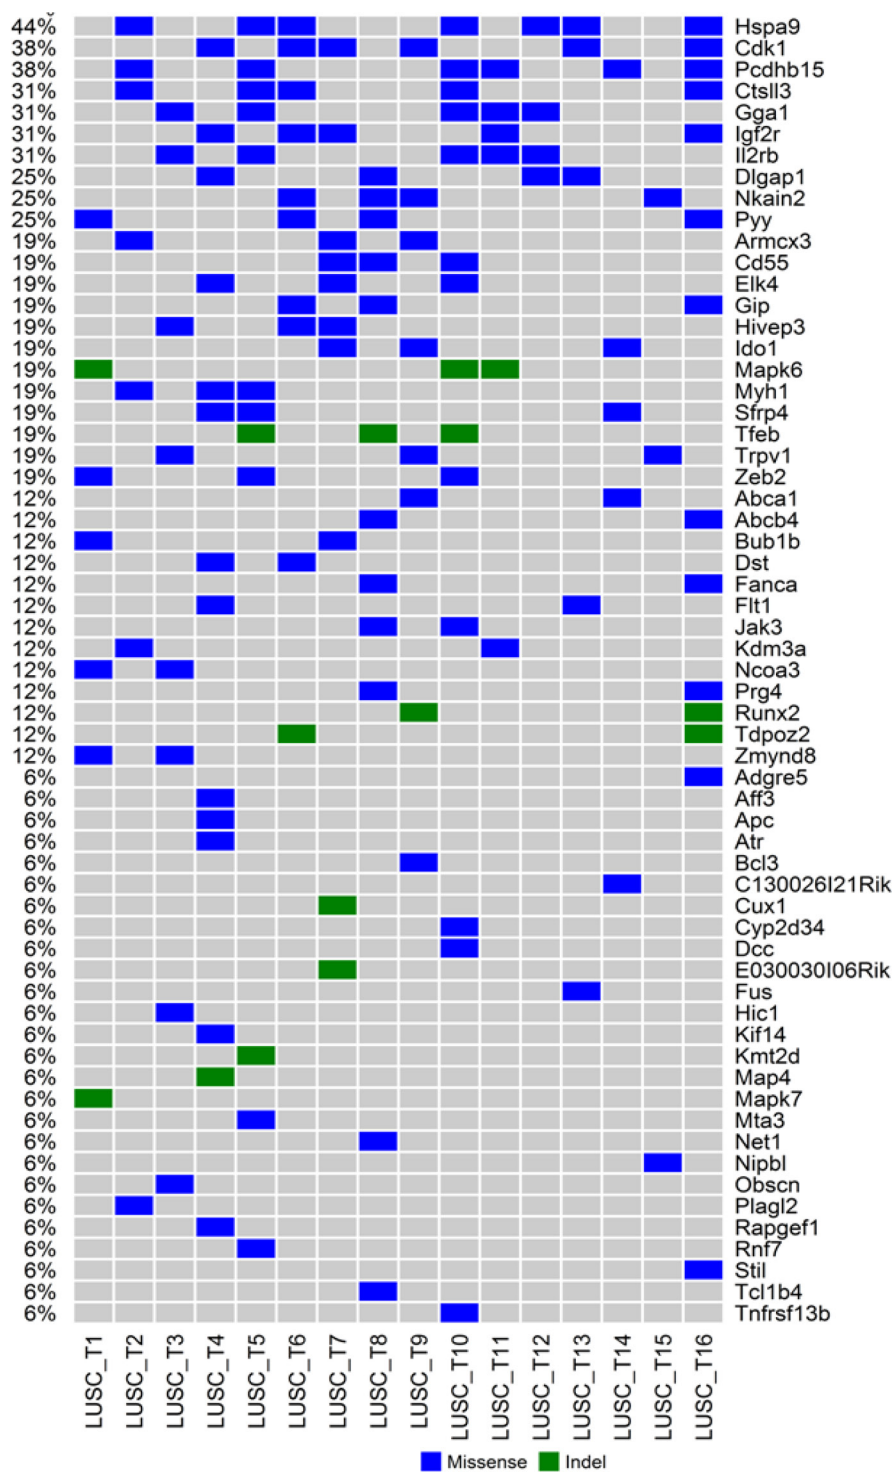

**Supplementary Figure 3: The clonal mutation spectrum across the 16 mice LUSC tumors.** There were nine most frequent clonal mutations identified in at least 4 of 16 LUSC tumors, including *Hspa9*: A651S (7), *Cdk1*: S39I (6), *Pcdhb15*: R461C (6), *Ctsll3*: P329S (5), *Gga1*: D358N (5), *Il2rb*: R475S (5), *Dlgap1*: A329T (4), *Nkain2*: V67L (4), and *Pyy*: P42L (4). Further details can be seen in Supplementary Table 3.

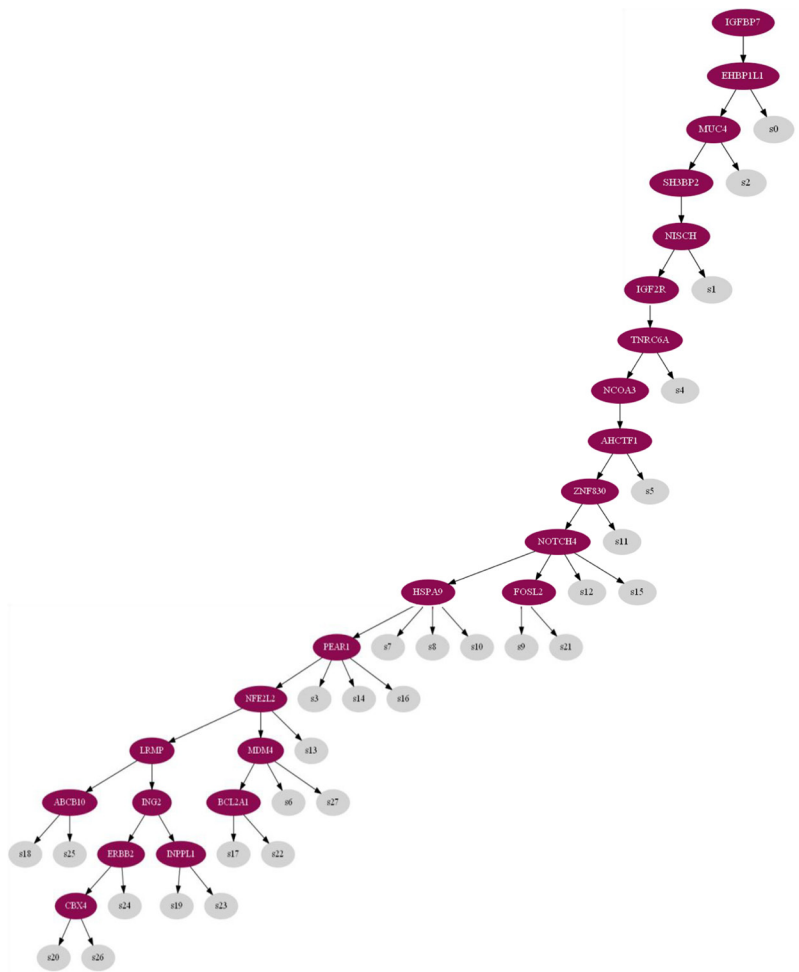

**Supplementary Figure 4: The evolution history based on the 23 somatic mutated genes identified from scRNA-seq data for the first mouse lung SCC tumor: LUSC1.** Cell IDs were marked as s0 to s27, corresponding to the single tumor cells of LUSC1\_sc1 to LUSC1\_sc28.

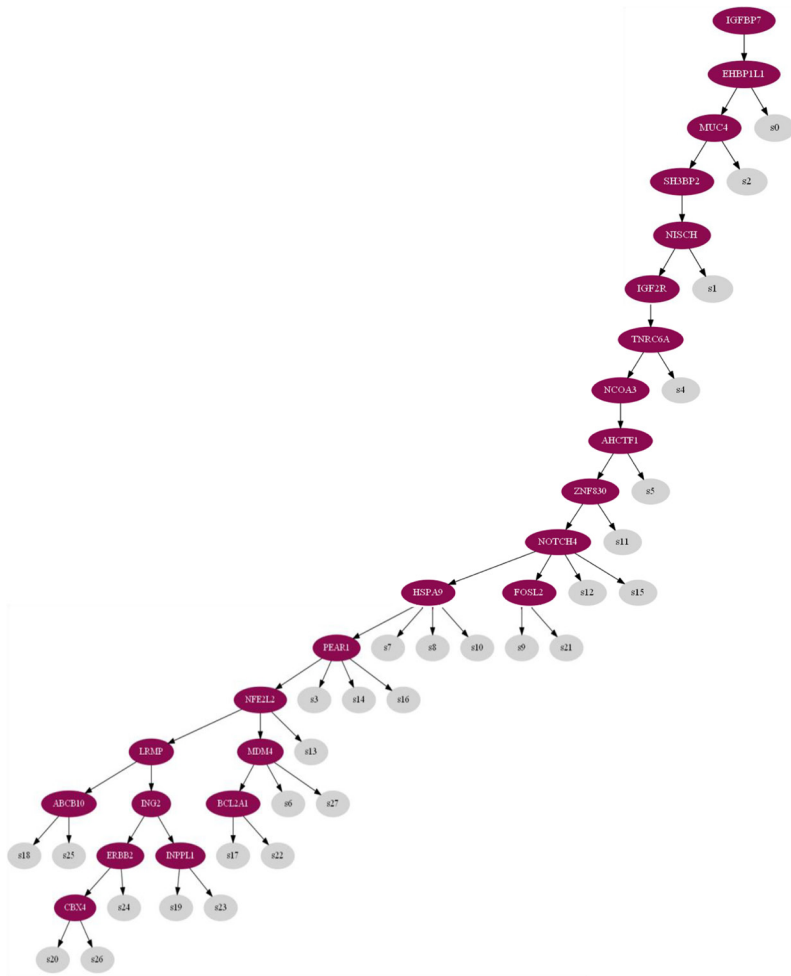

**Supplementary Figure 5: The evolution history based on the 15 somatic mutated genes identified from scRNA-seq data for the second mouse lung SCC tumor: LUSC2.** Cell IDs were marked as s0 to s19, corresponding to the single tumor cells of LUSC2\_sc1 to LUSC2\_sc20.

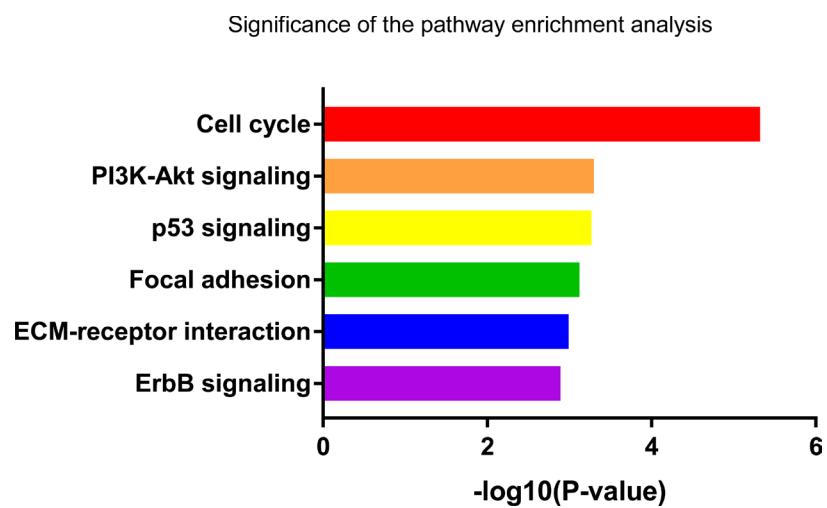

**Supplementary Figure 6: The G80 module member genes were significantly enriched in the six cancer related molecular pathways.**

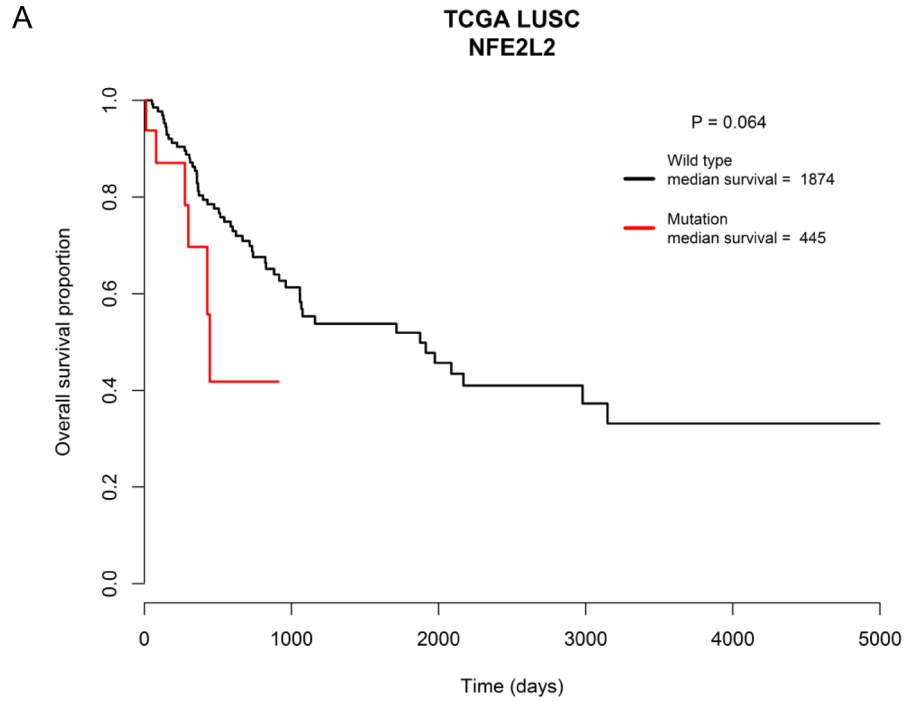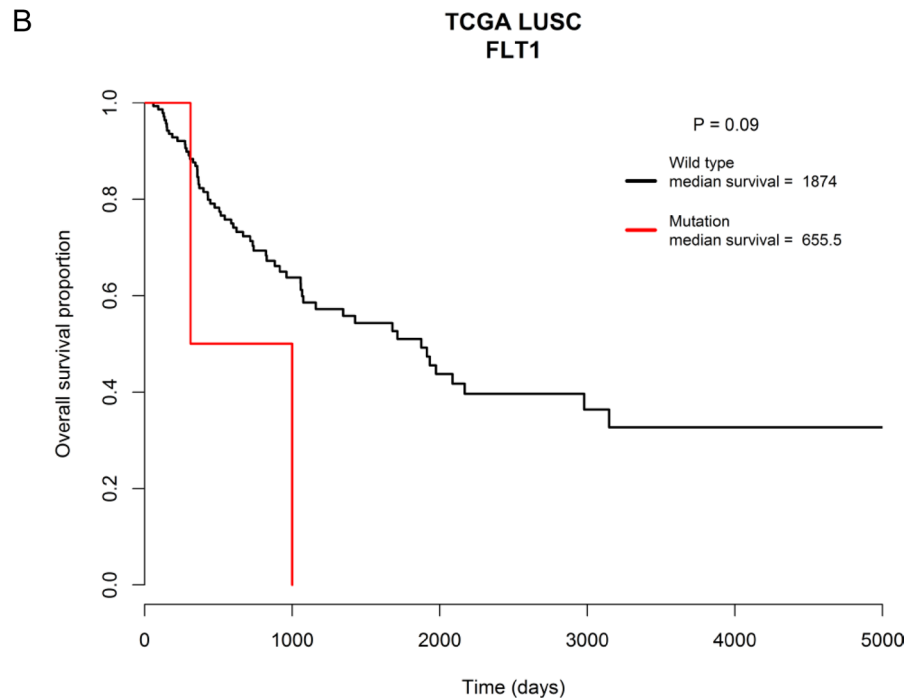

**Supplementary Figure 7: Survival outcome analysis based on the mutation status of two LUSC oncogenes.** There were trends toward significance for the associations of worse overall survival outcome with *NFE2L2* and *FLT1* mutations ( $P$  values = 0.06 and 0.09, respectively).

**Supplementary Table 1: Whole-exome sequencing quality control.**

| <b>Normal lung tissues</b>                                      | <b>Total reads</b>                                                      | <b>Proportion of reads in exon regions (%)</b> | <b>Mean exon coverage</b> | <b>% of bases covered at least 20 X</b> |
|-----------------------------------------------------------------|-------------------------------------------------------------------------|------------------------------------------------|---------------------------|-----------------------------------------|
| Normal1                                                         | 148,305,725                                                             | 48.4%                                          | 152.7                     | 85.6%                                   |
| Normal2                                                         | 140,789,378                                                             | 48.2%                                          | 143                       | 85.6%                                   |
| Normal3                                                         | 137,008,160                                                             | 47.9%                                          | 139.5                     | 85.6%                                   |
| Normal4                                                         | 123,729,539                                                             | 48.4%                                          | 126.5                     | 85.1%                                   |
| Normal5                                                         | 125,221,430                                                             | 48.9%                                          | 129.1                     | 84.8%                                   |
| Normal6                                                         | 118,934,788                                                             | 46.9%                                          | 116                       | 84.1%                                   |
| Normal7                                                         | 113,745,101                                                             | 47.3%                                          | 112.4                     | 83.7%                                   |
| Normal8                                                         | 184,503,827                                                             | 47.1%                                          | 179                       | 86.2%                                   |
| Average targeted reads coverage of 8 normal lung samples: 137 X | Range of targeted reads coverage of 8 normal lung samples: 112 X -179 X |                                                |                           |                                         |

  

| <b>Lung squamous cell carcinomas</b>                            | <b>Total reads</b>                                                      | <b>Proportion of reads in exon regions (%)</b> | <b>Mean exon coverage</b> | <b>% of bases covered at least 20 X</b> |
|-----------------------------------------------------------------|-------------------------------------------------------------------------|------------------------------------------------|---------------------------|-----------------------------------------|
| LUSC_T1                                                         | 115,623,278                                                             | 46.6%                                          | 113.2                     | 84.5%                                   |
| LUSC_T2                                                         | 143,468,652                                                             | 47.3%                                          | 144.4                     | 85.4%                                   |
| LUSC_T3                                                         | 146,429,531                                                             | 47.0%                                          | 145.7                     | 86.1%                                   |
| LUSC_T4                                                         | 117,332,091                                                             | 46.3%                                          | 113.7                     | 84.9%                                   |
| LUSC_T5                                                         | 152,956,054                                                             | 47.8%                                          | 156.3                     | 85.6%                                   |
| LUSC_T6                                                         | 120,838,889                                                             | 49.5%                                          | 127.4                     | 85.3%                                   |
| LUSC_T7                                                         | 139,534,885                                                             | 48.9%                                          | 144.2                     | 86.1%                                   |
| LUSC_T8                                                         | 122,729,417                                                             | 49.9%                                          | 130                       | 84.5%                                   |
| LUSC_T9                                                         | 137,098,819                                                             | 49.5%                                          | 144.9                     | 85.4%                                   |
| LUSC_T10                                                        | 156,753,606                                                             | 49.4%                                          | 164.9                     | 86.0%                                   |
| LUSC_T11                                                        | 131,113,699                                                             | 48.8%                                          | 136.4                     | 85.0%                                   |
| LUSC_T12                                                        | 106,097,197                                                             | 48.7%                                          | 109.2                     | 84.2%                                   |
| LUSC_T13                                                        | 108,925,874                                                             | 49.4%                                          | 110.2                     | 83.1%                                   |
| LUSC_T14                                                        | 93,847,098                                                              | 49.4%                                          | 97.7                      | 83.1%                                   |
| LUSC_T15                                                        | 96,740,881                                                              | 49.7%                                          | 101.7                     | 82.9%                                   |
| LUSC_T16                                                        | 113,586,184                                                             | 49.6%                                          | 118.7                     | 84.5%                                   |
| Average targeted reads coverage of 16 LUSC tumor samples: 129 X | Range of targeted reads coverage of 16 LUSC tumor samples: 98 X - 165 X |                                                |                           |                                         |

Exon reads coverages among 8 normal lung tissue samples and 16 LUSC tumor samples

**Supplementary Table 2: The list of 5664 somatic coding mutations across the 16 mice LUSC tumors, which consisted of 2885 missense, 106 nonsense, 2426 silent mutations, 167 small insertions and deletions (indels) and 80 alterations residing in exon-exon boundaries.** See Supplementary\_Table\_2

**Supplementary Table 3: The clonal mutations identified across the 16 mouse LUSC tumors.** See Supplementary\_Table\_3

**Supplementary Table 4: The details of the cancer gene mutations identified in the two mice LUSC tumors subjected to scRNA-seq**

| <b>Mouse gene</b> | <b>Chr</b> | <b>Start</b> | <b>Ref</b> | <b>Alt</b> | <b>Amino acid change</b> | <b>Tumor</b> |
|-------------------|------------|--------------|------------|------------|--------------------------|--------------|
| Igfbp7            | chr5       | 77836906     | C          | G          | p.R45P                   | LUSC1        |
| Muc4              | chr16      | 32776908     | A          | G          | p.M3179V                 | LUSC1        |
| Ncoa3             | chr2       | 165880571    | G          | A          | p.S594N                  | LUSC1        |
| Hspa9             | chr18      | 35098249     | C          | A          | p.A651S                  | LUSC1        |
| Igf2r             | chr17      | 12876657     | T          | G          | p.R2457S                 | LUSC1        |
| Nfe2l2            | chr2       | 75514233     | C          | G          | p.E527Q                  | LUSC1        |
| Ahctf1            | chr1       | 181683155    | G          | A          | p.T1871I                 | LUSC1        |
| Notch4            | chr17      | 34721987     | G          | A          | p.G1549S                 | LUSC1        |
| Sh3bp2            | chr5       | 34901808     | T          | C          | p.S293P                  | LUSC1        |
| Nisch             | chr14      | 31984857     | A          | C          | p.V1560G                 | LUSC1        |
| Ehbp111           | chr19      | 5719958      | G          | A          | p.P439L                  | LUSC1        |
| Tnrc6a            | chr7       | 130314100    | C          | T          | p.A533V                  | LUSC1        |
| Zfp830            | chr11      | 82578439     | G          | A          | p.R189K                  | LUSC1        |
| Pear1             | chr3       | 87554196     | G          | A          | p.P993S                  | LUSC1        |
| Lrmp              | chr6       | 145116556    | C          | A          | p.A310D                  | LUSC1        |
| Mdm4              | chr1       | 134888279    | G          | A          | p.A476V                  | LUSC1        |
| Abcb10            | chr8       | 126506478    | C          | G          | p.C79S                   | LUSC1        |
| Bcl2a1d           | chr9       | 88626151     | C          | T          | p.R136Q                  | LUSC1        |
| Cbx4              | chr11      | 118943450    | A          | G          | p.S138P                  | LUSC1        |
| ErbB2             | chr11      | 98289242     | G          | A          | p.V511I                  | LUSC1        |
| Fosl2             | chr5       | 32455267     | A          | C          | p.D229A                  | LUSC1        |
| Ing2              | chr8       | 48759959     | A          | T          | p.S26T                   | LUSC1        |
| Inpp1             | chr7       | 108978612    | G          | A          | p.H525Y                  | LUSC1        |
| Trp53             | chr11      | 69401058     | A          | T          | p.Q97L                   | LUSC2        |
| Kmt2d             | chr15      | 98670110     | C          | A          | p.D5179Y                 | LUSC2        |
| Cdk1              | chr10      | 68808901     | C          | A          | p.S39I                   | LUSC2        |
| Keap1             | chr9       | 21041687     | A          | G          | p.M156T                  | LUSC2        |
| Ppm1m             | chr9       | 106101479    | G          | A          | p.L16F                   | LUSC2        |
| Dync1h1           | chr12      | 111897370    | A          | G          | p.T3919A                 | LUSC2        |
| Myh9              | chr15      | 77599352     | A          | C          | p.V1405G                 | LUSC2        |
| Rasgrp2           | chr19      | 6413957      | C          | T          | p.P562S                  | LUSC2        |
| Slc19a1           | chr10      | 76505074     | C          | G          | p.R233G                  | LUSC2        |
| Tbl3              | chr17      | 24841403     | G          | A          | p.T299I                  | LUSC2        |
| Ltb               | chr17      | 35332104     | G          | C          | p.R91P                   | LUSC2        |
| Swap70            | chr7       | 117365328    | A          | G          | p.R2G                    | LUSC2        |
| Ing2              | chr8       | 48759959     | A          | T          | p.S26T                   | LUSC2        |
| Mbd2              | chr18      | 70728420     | G          | T          | p.G117V                  | LUSC2        |
| Pear1             | chr3       | 87554196     | G          | A          | p.P993S                  | LUSC2        |



**Supplementary Table 5: Immune markers differentially expressed in lung squamous cell carcinomas based on mutation status of the significant genes**

| Immune marker | Gene    | Fold change - Mutant vs Wt | P-value  |
|---------------|---------|----------------------------|----------|
| PD-L1         | HIVEP3  | -4.6                       | 2.83E-11 |
| PD-L1         | NKAIN2  | -3.9                       | 2.92E-11 |
| PD-L1         | RUNX2   | -4.3                       | 2.46E-09 |
| PD-L1         | MUC4    | -3.0                       | 2.31E-06 |
| PD-L1         | CUX1    | -3.5                       | 9.02E-06 |
| PD-L1         | NIPBL   | -2.8                       | 6.07E-05 |
| PD-L1         | PLAGL2  | -3.4                       | 0.000103 |
| PD-L1         | NFE2L2  | 1.9                        | 0.018999 |
| VISTA         | KEAP1   | -1.4                       | 0.000573 |
| VISTA         | FANCA   | -1.9                       | 0.007671 |
| VISTA         | AFF3    | -1.8                       | 0.008345 |
| VISTA         | FLT1    | 1.5                        | 0.019575 |
| TIM3          | RET     | -1.9                       | 4.17E-10 |
| TIM3          | FANCA   | -2.2                       | 0.000711 |
| TIM3          | ZMYND8  | -1.8                       | 0.028059 |
| TIM3          | DYNC1H1 | 1.3                        | 0.026799 |
| LAG3          | CUX1    | -3.0                       | 6.88E-07 |
| LAG3          | FANCA   | -2.4                       | 0.000473 |
| LAG3          | NOTCH4  | -2.0                       | 0.027645 |

**Supplementary Table 6: The G80 module member genes that were significantly enriched in the six cancer related molecular pathways**

| Pathway                  | p-value  | q-value  | Members_input_overlap                              |
|--------------------------|----------|----------|----------------------------------------------------|
| Cell cycle               | 4.77E-06 | 0.000196 | CCNB1; CCNA2; BUB1B; PLK1; CCNE1; CDC20; CDK1      |
| PI3K-Akt signaling       | 0.000501 | 0.005492 | PGF; ITGB4; CCNE1; EGFR; EIF4EBP1; NGFR; TNC; SPP1 |
| p53 signaling            | 0.000536 | 0.005492 | CDK1; CCNB1; CCNE1; SERPINB5                       |
| Focal adhesion           | 0.000758 | 0.006213 | PGF; ITGB4; EGFR; SPP1; TNC; PAK1                  |
| ECM-receptor interaction | 0.001028 | 0.007025 | SDC1; SPP1; ITGB4; TNC                             |
| ErbB signaling           | 0.001282 | 0.007508 | CBLC; EIF4EBP1; EGFR; PAK1                         |
